# Supplementary material
Source: HighWire-hosted journal article supplement (https://erj.ersjournals.com/content/55/5/1901903)
Supplement: inline-supplementary-material-1 [file inline-supplementary-material-1.pdf]

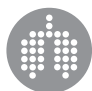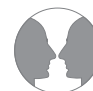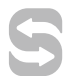

SHAREABLE PDF

# Therapeutic drug monitoring using saliva as matrix: an opportunity for linezolid, but challenge for moxifloxacin

Simone H.J. van den Elsen<sup>1</sup>, Onno W. Akkerman<sup>2,3</sup>, Erwin M. Jongedijk<sup>1</sup>, Mireille Wessels<sup>1</sup>, Samiksha Ghimire<sup>1</sup>, Tjip S. van der Werf<sup>3,4</sup>, Daan J. Touw<sup>1</sup>, Mathieu S. Bolhuis<sup>1</sup> and Jan-Willem C. Alffenaar<sup>1,5,6,7</sup>

**Affiliations:** <sup>1</sup>University of Groningen, University Medical Center Groningen, Dept of Clinical Pharmacy and Pharmacology, Groningen, The Netherlands. <sup>2</sup>University of Groningen, University Medical Center Groningen, Tuberculosis Center Beatrixoord, Haren, The Netherlands. <sup>3</sup>University of Groningen, University Medical Center Groningen, Dept of Pulmonary Diseases and Tuberculosis, Groningen, The Netherlands. <sup>4</sup>University of Groningen, University Medical Center Groningen, Dept of Internal Medicine, Groningen, The Netherlands. <sup>5</sup>Sydney Pharmacy School, Faculty of Medicine and Health, The University of Sydney, Sydney, Australia. <sup>6</sup>Westmead hospital, Sydney, Australia. <sup>7</sup>Marie Bashir Institute of Infectious Diseases and Biosecurity, Sydney, Australia.

**Correspondence:** Jan-Willem C. Alffenaar, University of Sydney, Faculty of Medicine and Health, School of Pharmacy, Pharmacy Building A15, NSW 2006, Australia. E-mail: johannes.alffenaar@sydney.edu.au

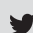

@ERSpublications

Therapeutic drug monitoring using saliva as matrix is a suitable alternative for serum therapeutic drug monitoring of linezolid, but not for moxifloxacin due to a high variability in saliva-plasma ratios <http://bit.ly/2NIYdz7>

**Cite this article as:** van den Elsen SHJ, Akkerman OW, Jongedijk EM, *et al.* Therapeutic drug monitoring using saliva as matrix: an opportunity for linezolid, but challenge for moxifloxacin. *Eur Respir J* 2020; 55: 1901903 [<https://doi.org/10.1183/13993003.01903-2019>].

This single-page version can be shared freely online.

## To the Editor:

The World Health Organization (WHO) has listed moxifloxacin and linezolid among the preferred “group A” drugs in the treatment of multidrug-resistant (MDR)-tuberculosis (TB) [1]. Therapeutic drug monitoring (TDM) could potentially optimise MDR-TB therapy, since moxifloxacin and linezolid show large pharmacokinetic variability [1–4]. TDM of moxifloxacin focuses on identifying patients with low drug exposure who are at risk of treatment failure and acquired fluoroquinolone resistance [5, 6]. Alternatively, TDM of linezolid strives to reduce toxicity while ensuring an adequate drug exposure because of its narrow therapeutic index [1, 3, 7].
